# Supplementary material for: A colorimetric, NIR, ultrafast fluorescent probe for ferric iron detection based on the PET mechanism and its multiple applications
Source: Royal Society of Chemistry journal article supplement (doi:10.1039/d2tc00727d), 2022-01-01
Supplement: d2tc00727d1.pdf [file d2tc00727d1.pdf]

## **A colorimetric, NIR, ultrafast fluorescent probe for ferric iron based on PET mechanism and its multiple application**

Yuqing He,<sup>a</sup> Xiaofei Sun,<sup>a\*</sup> Xiaomei Yan,<sup>b</sup> Yang Li,<sup>a</sup> Keli Zhong,<sup>a\*</sup> and Lijun Tang,

<sup>a\*</sup>

*a. College of Chemistry and Materials Engineering; College of Food Science and Technology, Bohai University; Food Safety Key Lab of Liaoning Province; National & Local Joint Engineering Research Center of Storage, Processing and Safety Control Technology for Fresh Agricultural and Aquatic Products; Jinzhou, 121013, China.*

*b. College of Laboratory Medicine, Dalian Medical University, Dalian, 116044, China.*

**\* Corresponding author**

*E-mail: sunxf@bhu.edu.cn (X. Sun), zhongkeli2000@bhu.edu.cn (K. Zhong),  
ljtang@bhu.edu.cn (L. Tang).*

**Table S1** NIR fluorescent probe recognition of Fe<sup>3+</sup> published by literature

| No. | Target                                 | Molecular structure                                                                 | $\lambda_{\text{ex}}/\lambda_{\text{em}}$<br>(nm) | LOD<br>( $\mu\text{M}$ ) | Application                                                                | Literature                                                    |
|-----|----------------------------------------|-------------------------------------------------------------------------------------|---------------------------------------------------|--------------------------|----------------------------------------------------------------------------|---------------------------------------------------------------|
| 1   | Fe <sup>3+</sup> /<br>Cu <sup>2+</sup> | 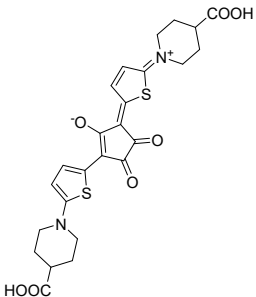   | —/818                                             | —                        | none                                                                       | Tetrahedron<br><b>2015</b> , 71,<br>5478                      |
| 2   | Fe <sup>3+</sup>                       | 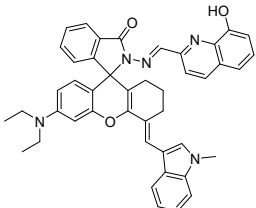   | 650/700                                           | 0.12                     | Living cells<br>Zebrafishes                                                | J. Lumin.<br><b>2019</b> , 207,<br>613.                       |
| 3   | Hg <sup>2+</sup><br>/Fe <sup>3+</sup>  | 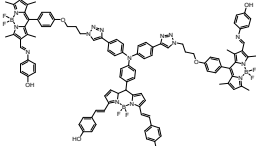  | 460/670                                           | 0.515/<br>0.681          | Living cells                                                               | J. Mater.<br>Chem. B<br><b>2016</b> , 4,<br>7549.             |
| 4   | Fe <sup>3+</sup>                       | 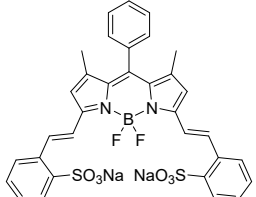 | 565/628                                           | 0.0142                   | Water<br>sample                                                            | J. Photochem.<br>Photobiol., A<br><b>2018</b> , 355,<br>78.   |
| 5   | Fe <sup>3+</sup>                       | 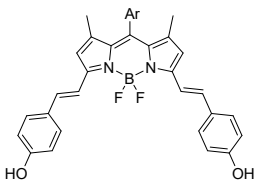 | 378/697                                           | 3.75                     | Living cells                                                               | Spectrochim.<br>Acta, Part A<br><b>2020</b> , 228,<br>117720. |
| 6   | Fe <sup>3+</sup>                       | 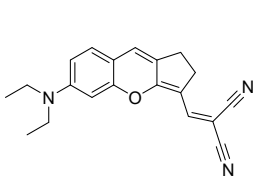 | 570/670                                           | 19.47                    | Living cells<br>Lake water<br>Tap water<br>anti-<br>counterfeiti<br>ng ink | This work                                                     |

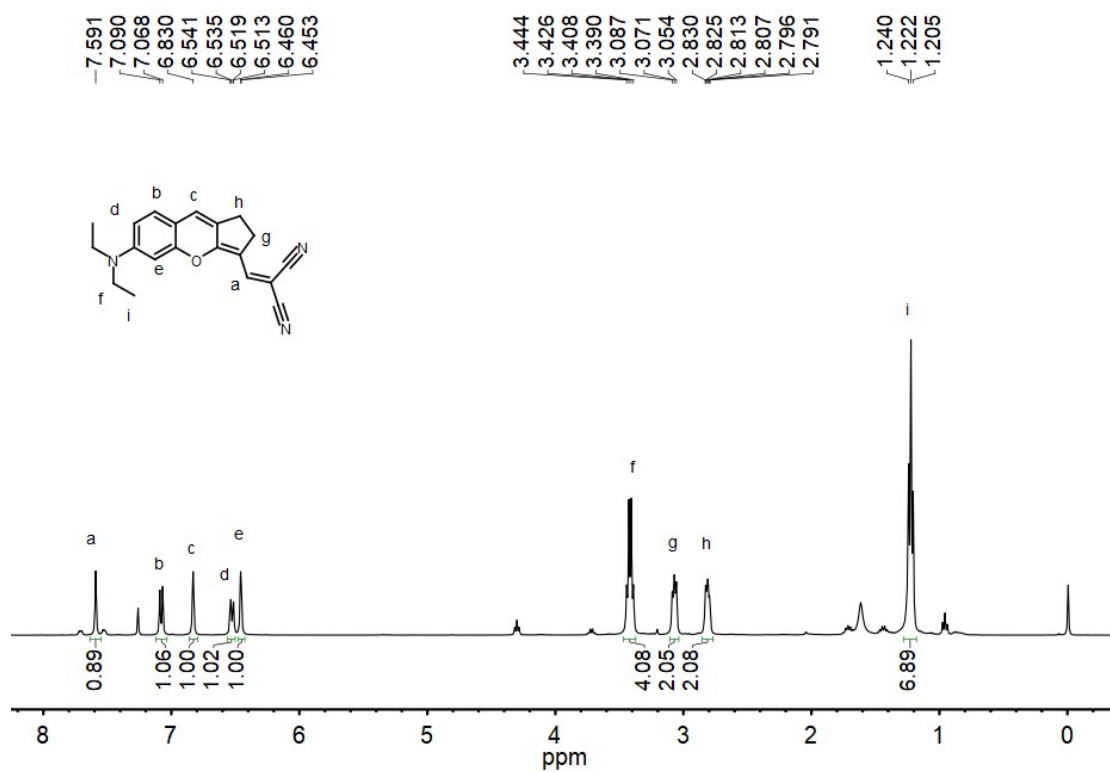

**Figure S1.** <sup>1</sup>H NMR spectrum of compound **DCA-MIn** in CDCl<sub>3</sub>

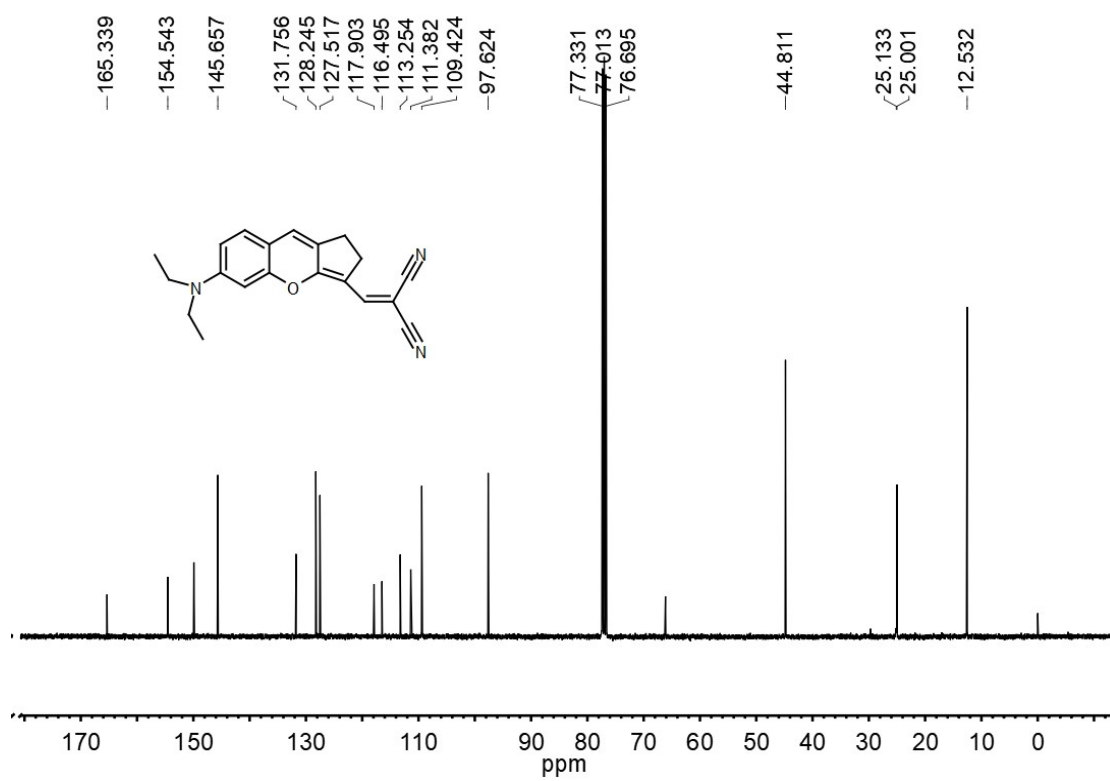

**Figure S2.** <sup>13</sup>C NMR spectrum of **DCA-MIn** in CDCl<sub>3</sub>

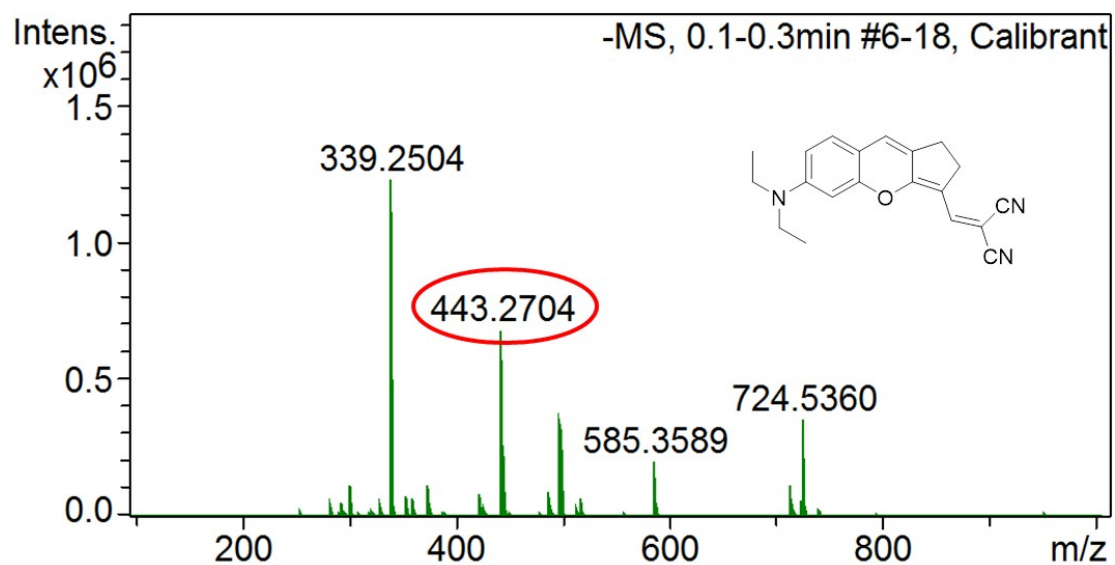

**Figure S3.** HRMS spectrum of **DCA-MIn** in  $\text{CH}_3\text{CH}_2\text{OH}$

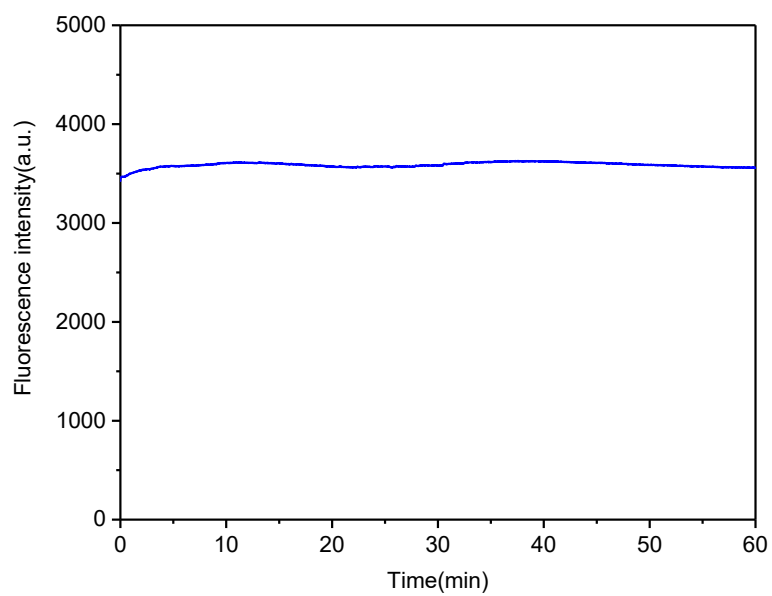

**Figure S4.** The change of fluorescence intensity of **DCA-MIn** over time

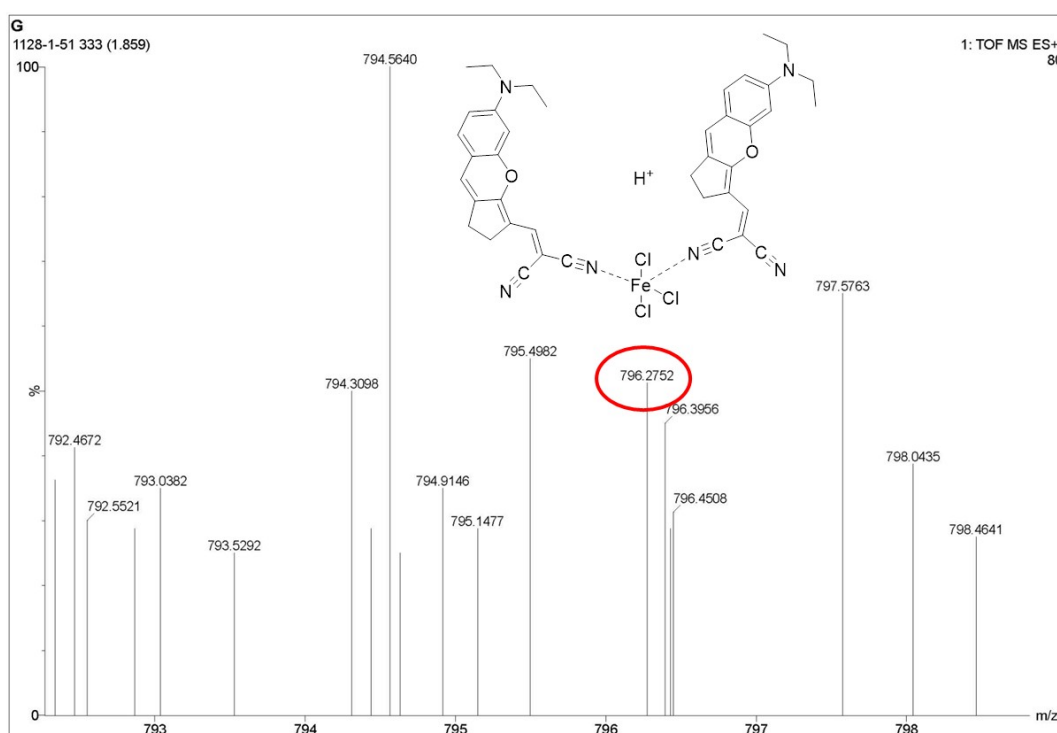

**Figure S5.** HRMS spectrum of compound **DCA-Mln** +  $\text{Fe}^{3+}$  in EtOH ( $\text{ESI}^+$ ) calcd for  $\text{C}_{40}\text{H}_{39}\text{Cl}_3\text{FeN}_6\text{O}_6^+ [2\text{M} + \text{FeCl}_3 + \text{H}]^+ = 796.2544$ , Found = 796.2752

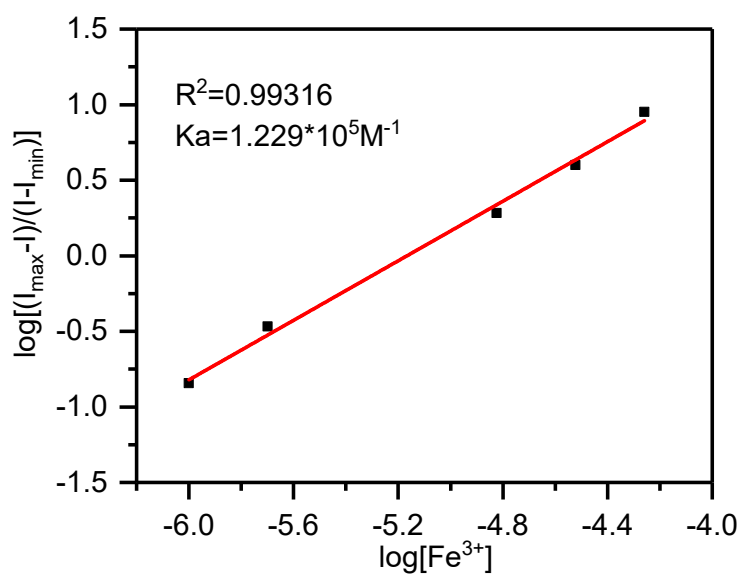

**Figure S6.** **DCA-Mln** and  $\text{Fe}^{3+}$  complex (2:1) combined with Hill equation diagram of stoichiometry

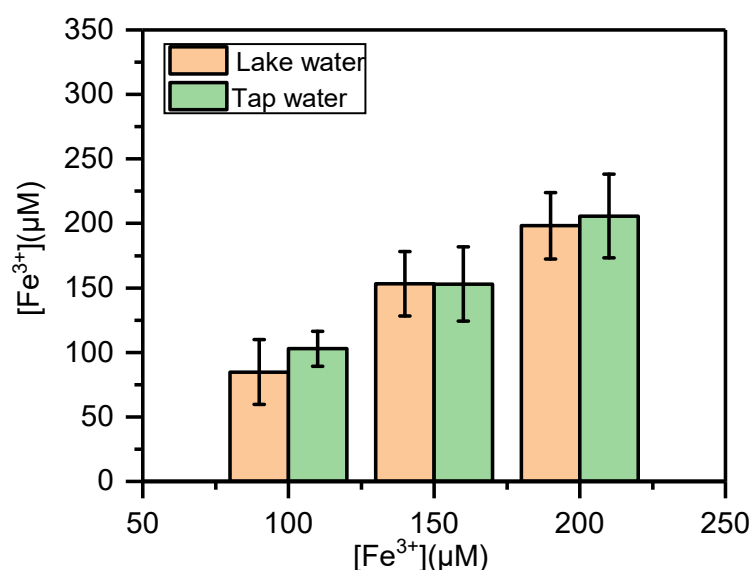

**Figure S7.** The concentration of Fe<sup>3+</sup> using **DCA-MIn** (10 μM) detection in two actual water samples.

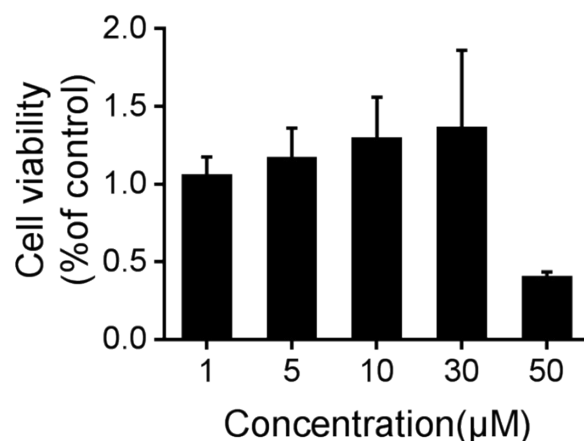

**Figure S8.** Cell viability evaluated by CCK-8 analysis after co-culturing MCF-7 Cells with different concentrations of **DCA-MIn** (1, 5, 10, 30, 50 μM) at 37 °C for 24 h.

## Experimental

### Instruments and materials

High-resolution mass spectra (HRMS) were measured using a Bruker micrOTOF-Q mass spectrometer (Bruker Daltonik, Bremen, Germany). <sup>1</sup>H NMR and <sup>13</sup>C NMR spectra were recorded on an Agilent 400MR spectrometer, and the chemical shifts were expressed in ppm and coupling constants (J) in hertz. Use F-4700FL

Fluorescence Spectrophotometer (Japan) to measure the fluorescence spectrum. The pH measurement was carried out on a Model PHS-25 Bmeter (Shanghai, China). Cell imaging was observed under a confocal laser scanning microscope (LEICA TCS SP5 II, Germany) with excitation at 570 nm.

Unless otherwise noted, reagents were purchased from commercial suppliers and used without further purification. The compound **DCA** was prepared according to the reported method [S1]. MCF-7 (human breast carcinoma) cells were obtained from the Institute of Basic Medical Sciences (IBMS) of Chinese Academy of Medical Sciences (CAMS).

### **General methods of experiment**

All experiments were carried out at room temperature. Deionized water was used throughout the experiment. A stock solution (50 mM) of cations (corresponding metal nitrate or chloride),  $\text{FeCl}_3$  are used as iron ion sources. Prepare a stock solution of **DCA-MIn** at 10 mM in DMSO. It was further diluted with a mixed solution of MeOH/ $\text{H}_2\text{O}$  (v/v, 5/5) to a final concentration of 10  $\mu\text{M}$ . The fluorescence spectrum was recorded by excitation at 570 nm. The width of the excitation and emission slits were both 5 nm.

### **Detection of $\text{Fe}^{3+}$ in real water samples**

We use the standard curve method for quantitative analysis. First, we tested the responses of the fluorescence emission intensity (670 nm) of **DCA-MIn** to various concentrations of  $\text{Fe}^{3+}$  in different water samples (lake water, tap water) using an excitation of 570 nm. Then, we obtained a linear relationship curve as the standard curve (Figure 9,  $y=kx+b$ , y: fluorescence emission intensity; x: concentration of  $\text{Fe}^{3+}$ ). Finally, we used the standard additions method to determine the recovery. That means we added the different concentration of  $\text{Fe}^{3+}$  within the range of the standard curve, and tested the fluorescence intensity of **DCA-MIn**, and then x which is “ $\text{Fe}^{3+}$  found” value is calculated by substituting the fluorescence intensity value into the above-mentioned formula.

### **Cell viability assays**

After the addition of different concentrations of **DCA-MIn** (10, 50, 100, 300, 500  $\mu\text{M}$ ), the incubated MCF-7 cells were cultured for 24 h. The 10  $\mu\text{L}$  CCK-8 (Cell Counting Kit-8, Dojindo, Japan) was added into **DCA-MIn** -pretreated cells, and the cells were further incubated for another 4 hours. After being washed three times with PBS, the absorbance at 570 nm of cells was recorded, and cell viability was calculated using the reported methods of literature.

### **Preparation of anti-counterfeiting ink**

**DCA-MIn** was dissolved using ethanol and a small amount of glycerin, after stirring 10 minutes to obtain anti-counterfeiting ink. The imprints of Chinese characters and English letters were obtained by using the stamp to dip anti-counterfeiting ink on the silicone plate, and then the imprints were observed using portable UV lamp.

### **Reference**

[S1] Richard, Jean-Alexandre, Romieu, et al. Synthesis of N,N-dialkylamino-nor-dihydroxanthene-hemicyanine fused near-infrared fluorophores and their first water-soluble and/or bioconjugatable analogues. *Chemistry An Asian Journal*, 2017, 12(8):936-946.
